# Supplementary material for: Chromosome anchoring in Senegalese sole (Solea senegalensis) reveals sex-associated markers and genome rearrangements in flatfish
Source: PubMed Central journal article supplement (PMC8242048; doi:10.1038/s41598-021-92601-5), 2021-06-29

**SseLG 1**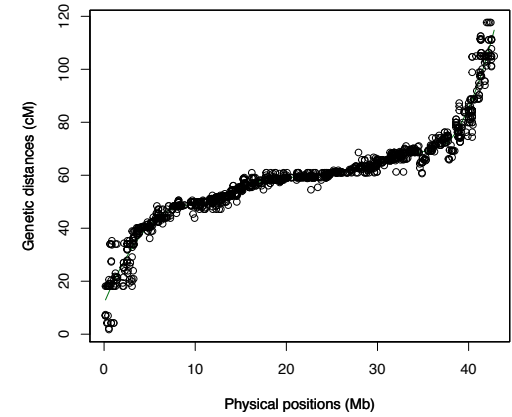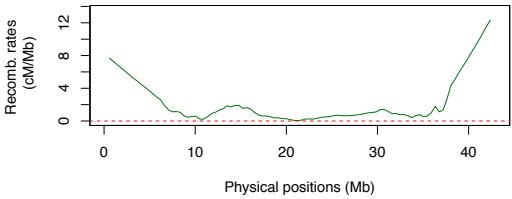**SseLG 2**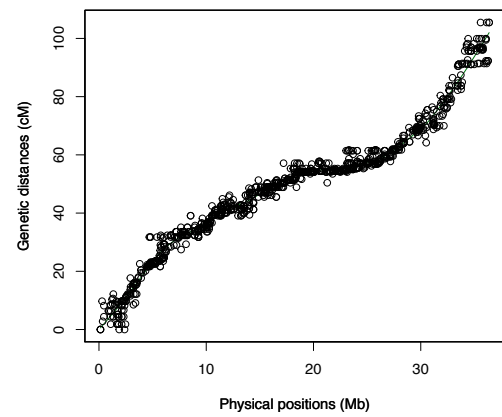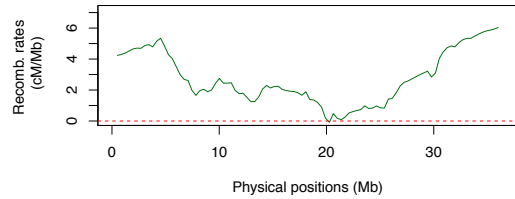**SseLG 3**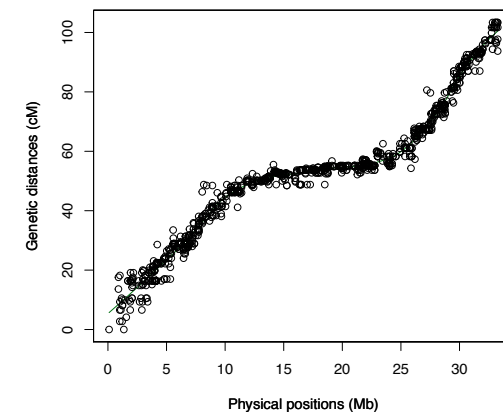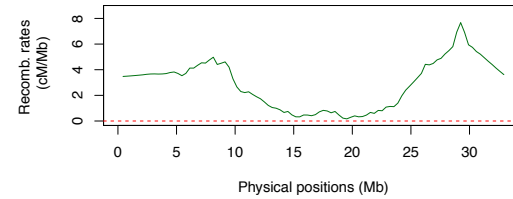**SseLG 4**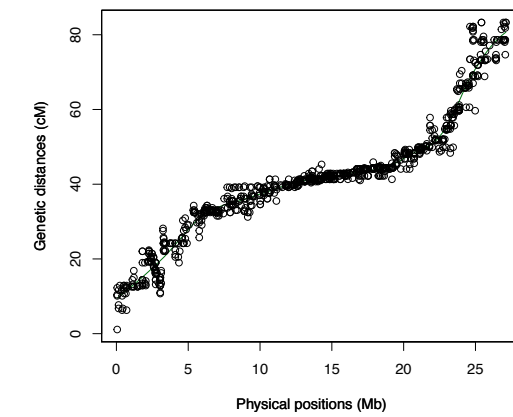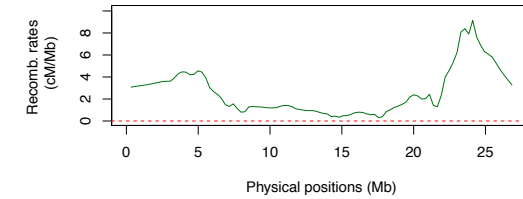**SseLG 5**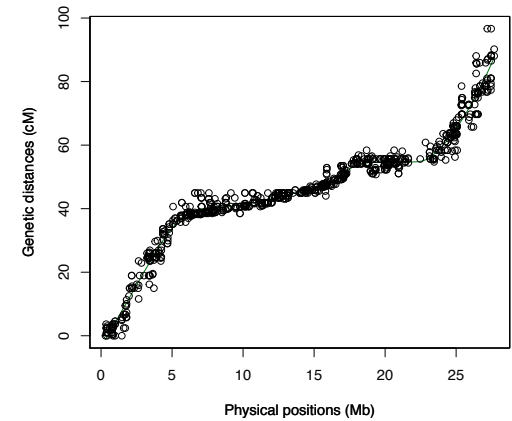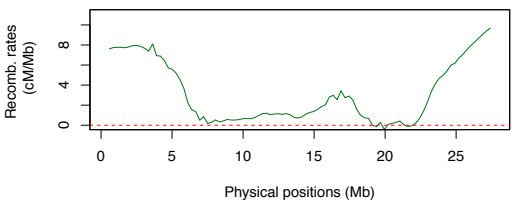**SseLG 6**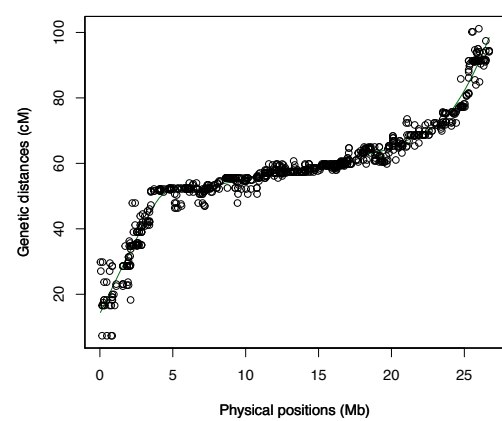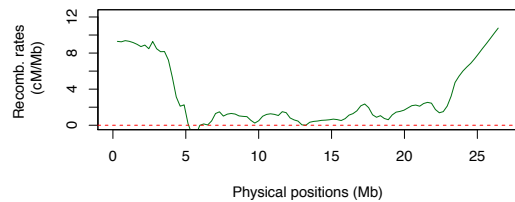**SseLG 7**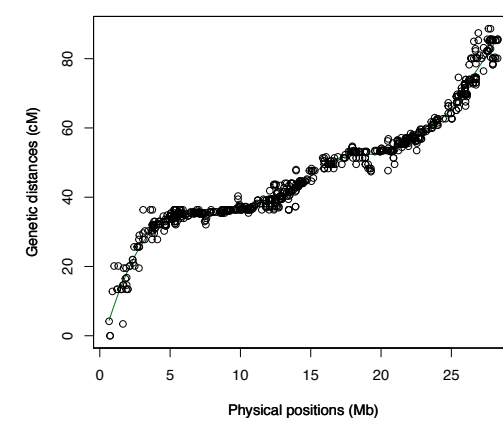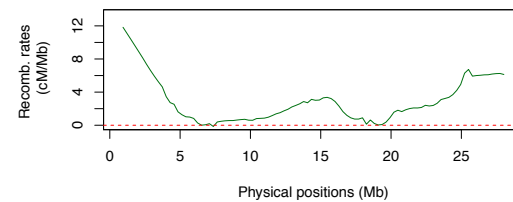**SseLG 8**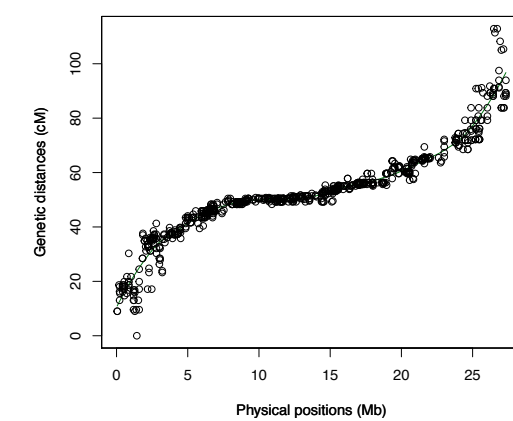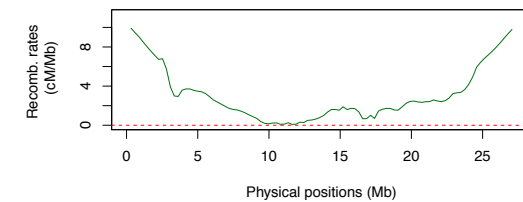

**SseLG 9**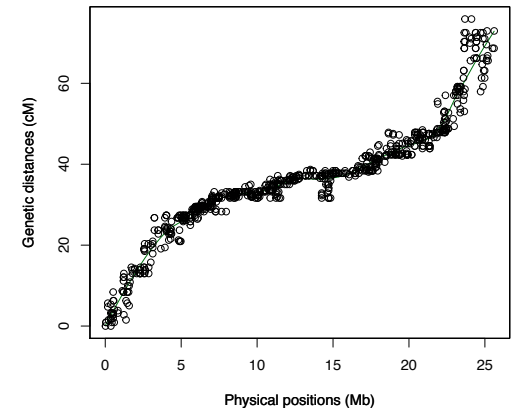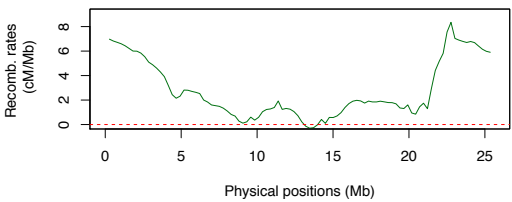**SseLG 10**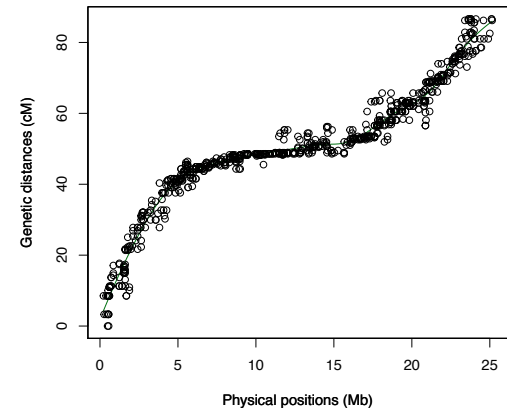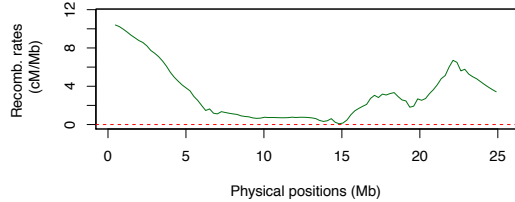**SseLG 11**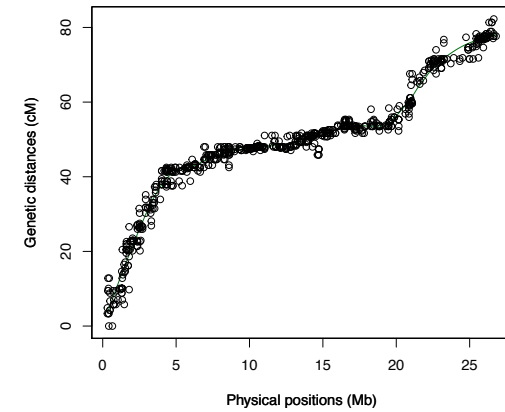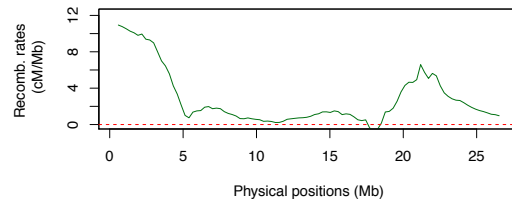**SseLG 12**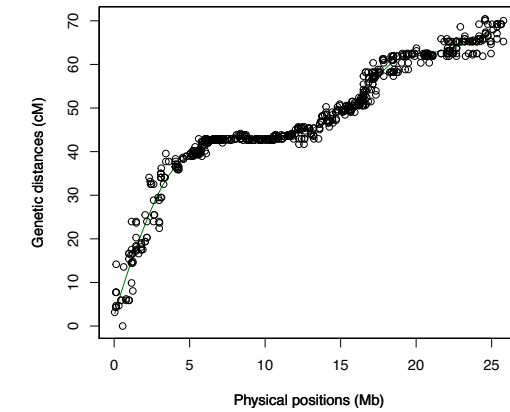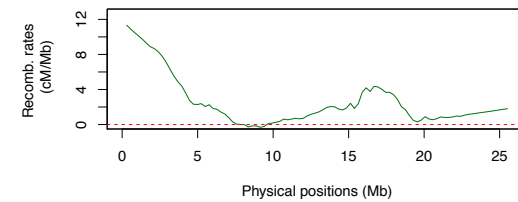**SseLG 13**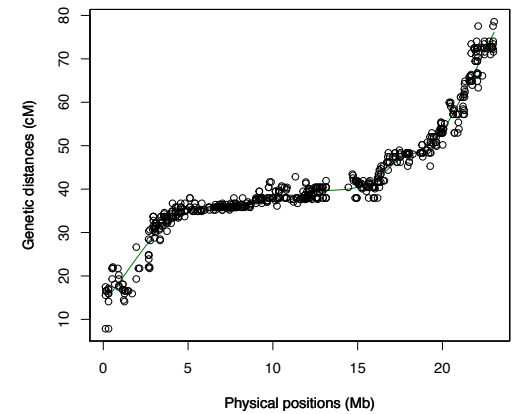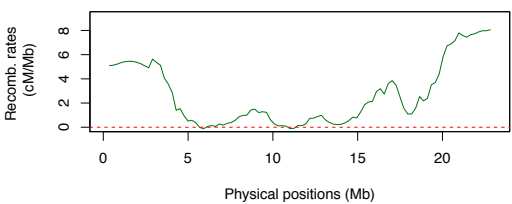**SseLG 14**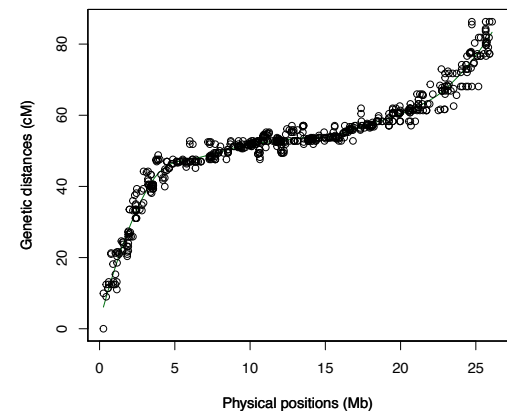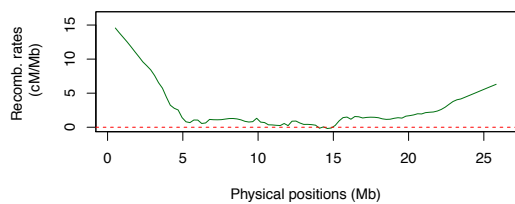**SseLG 15**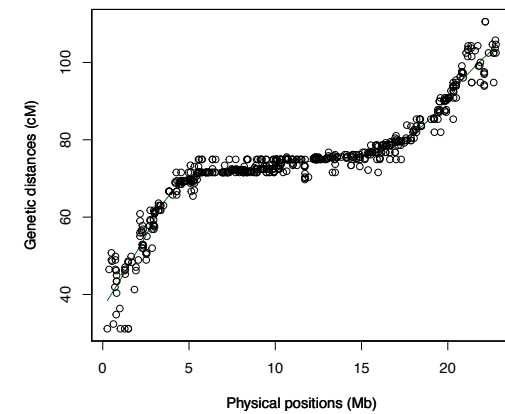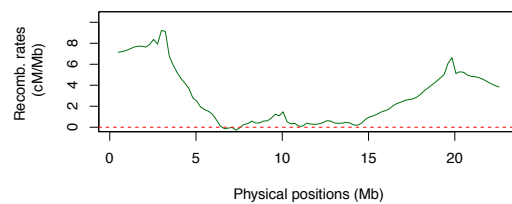**SseLG 16**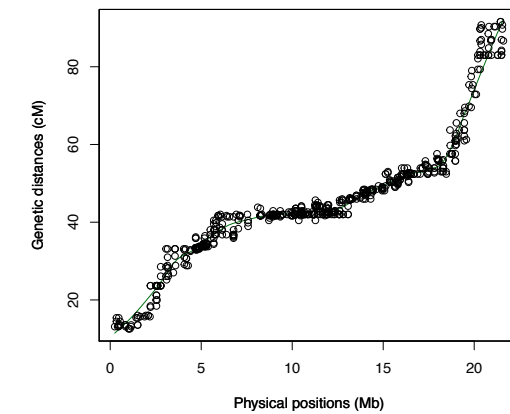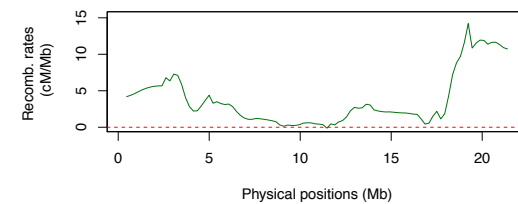

**SseLG 17**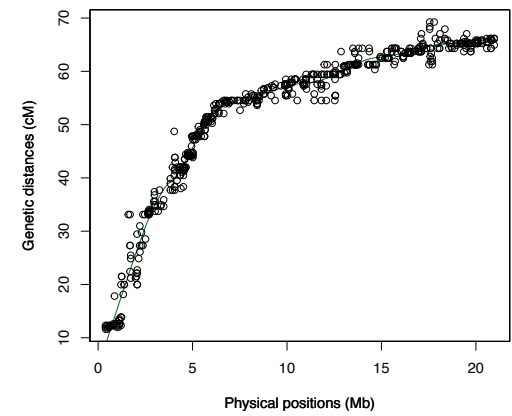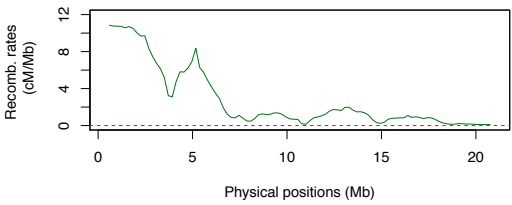**SseLG 18**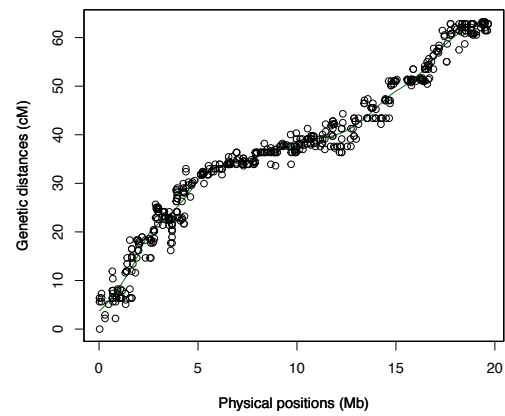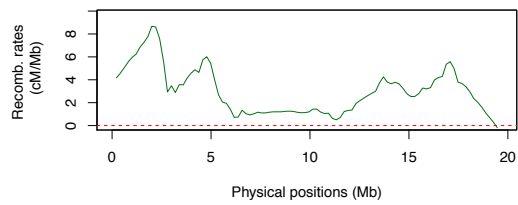**SseLG 19**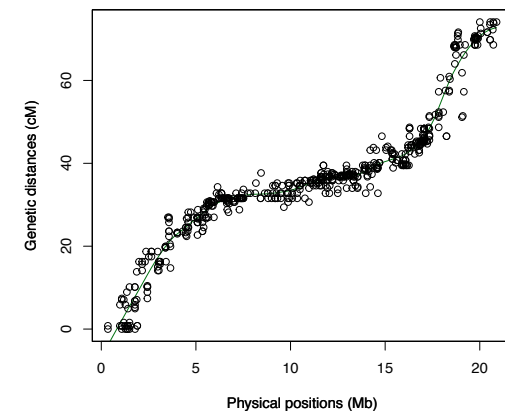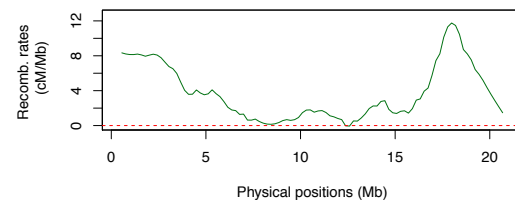**SseLG 20**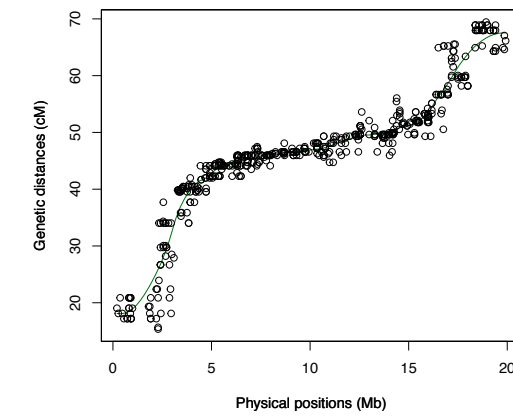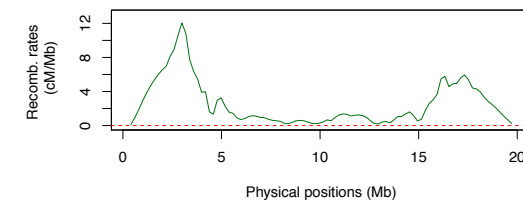**SseLG 21**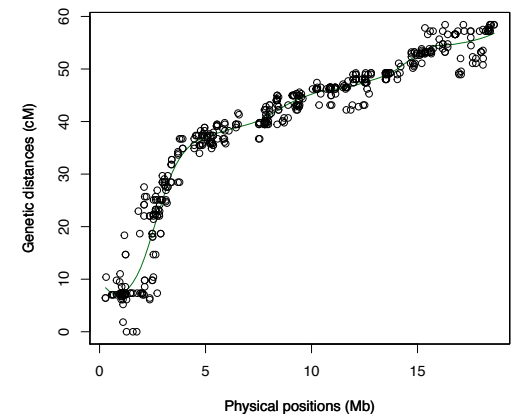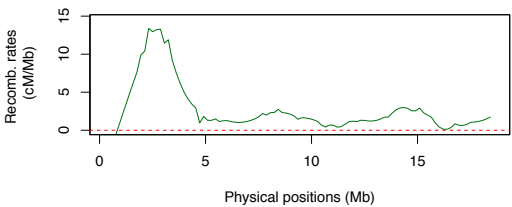

Supplement: 41598_2021_92601_MOESM3_ESM.pdf [file 41598_2021_92601_MOESM3_ESM.pdf]
