# Supplementary material for: Chromosome anchoring in Senegalese sole (Solea senegalensis) reveals sex-associated markers and genome rearrangements in flatfish
Source: PubMed Central journal article supplement (PMC8242048; doi:10.1038/s41598-021-92601-5), 2021-06-29

**SseLG1**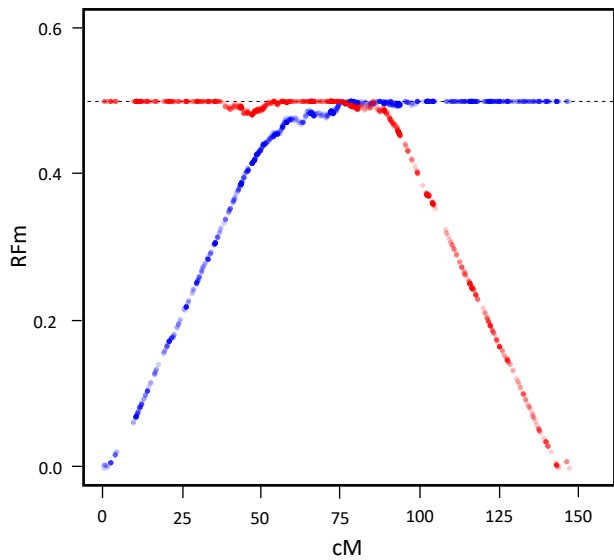**SseLG2**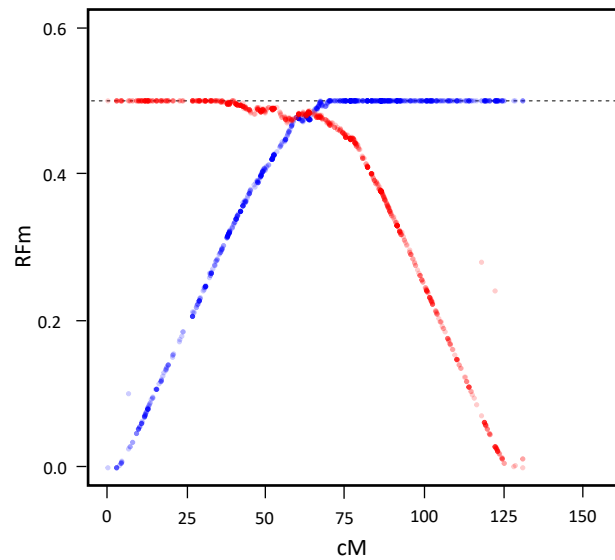**SseLG3**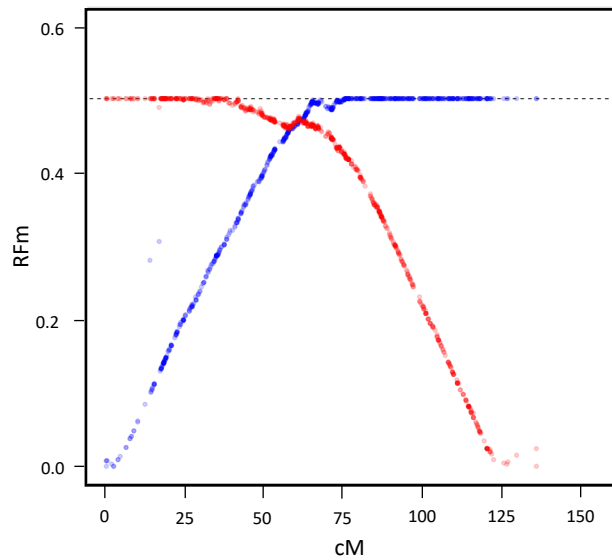**SseLG4**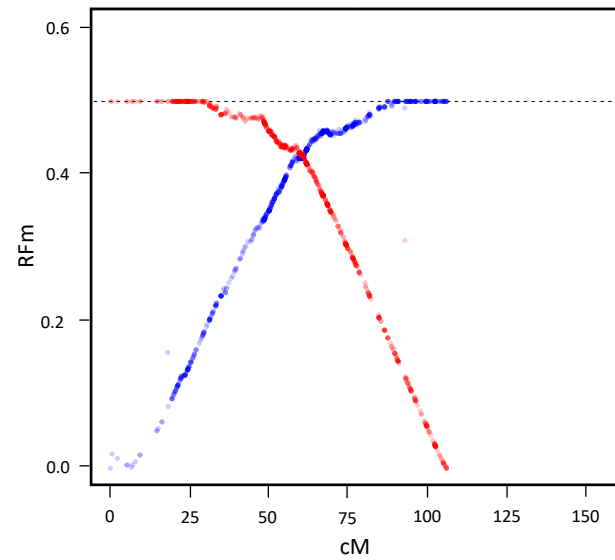**SseLG5**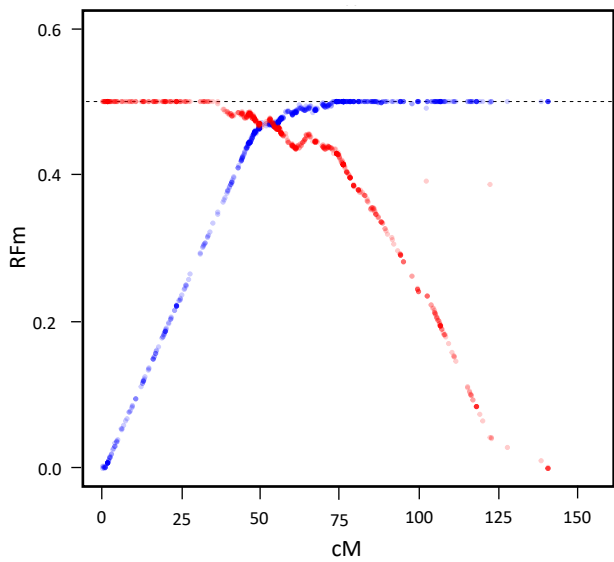**SseLG6**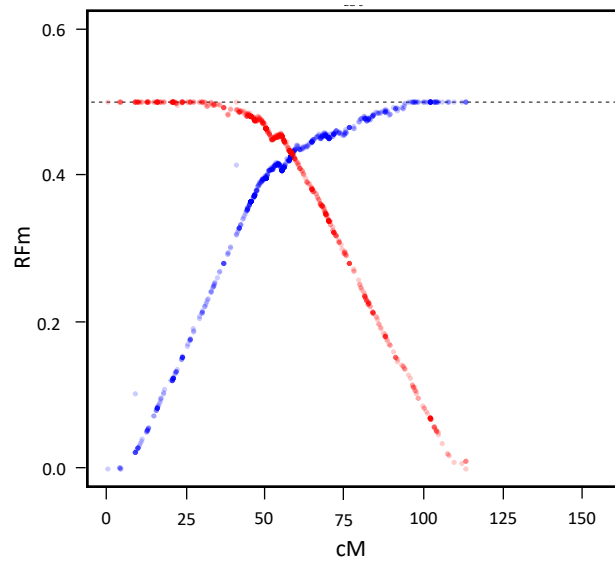**SseLG7**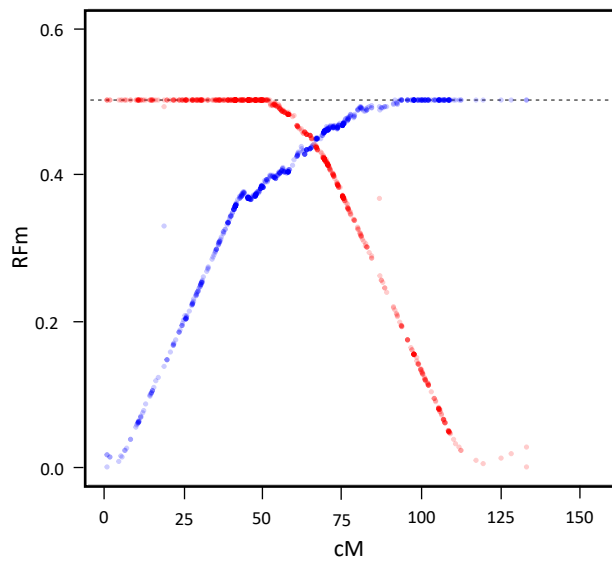**SseLG8**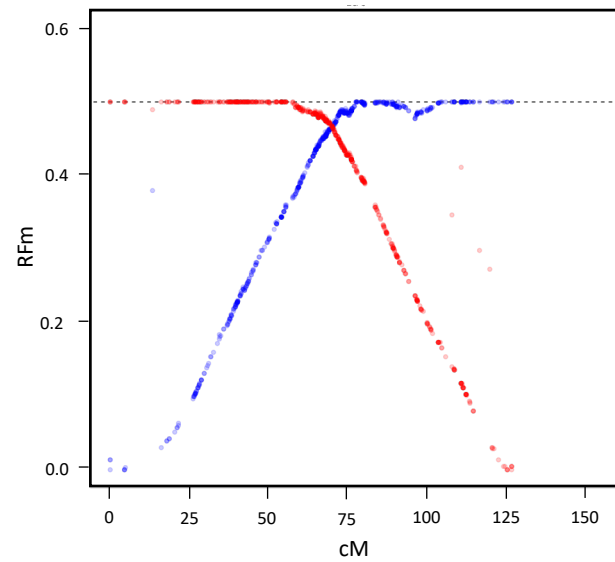

**SseLG9**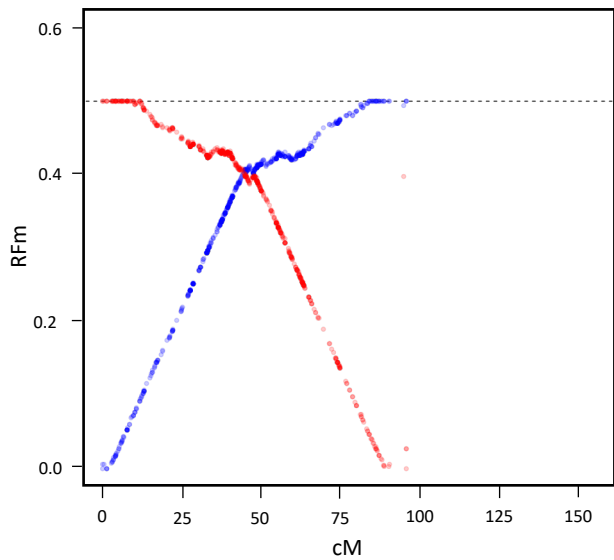**SseLG10**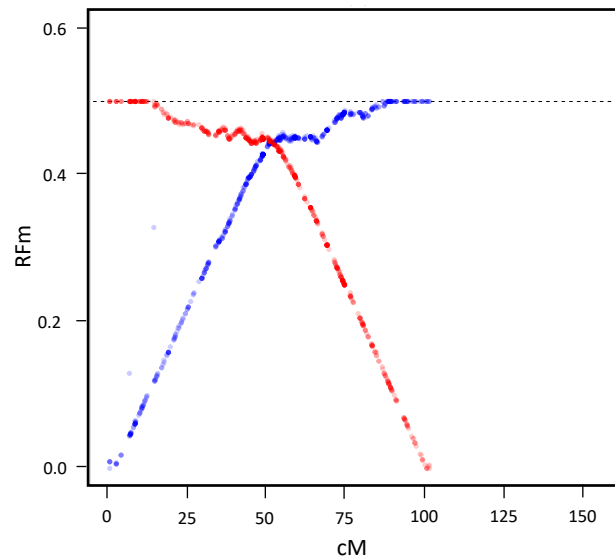**SseLG11**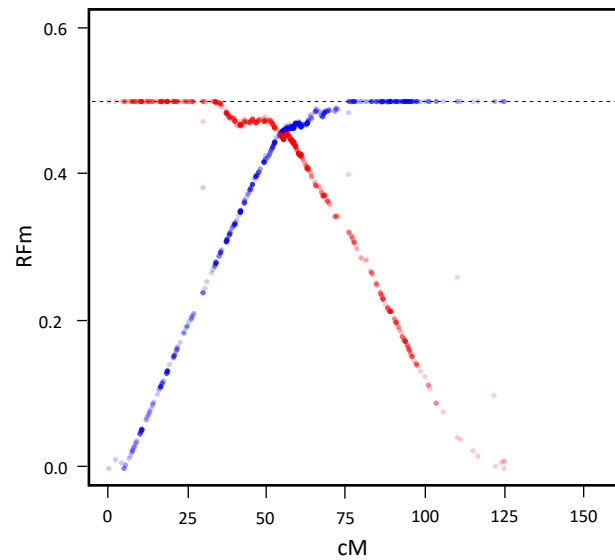**SseLG12**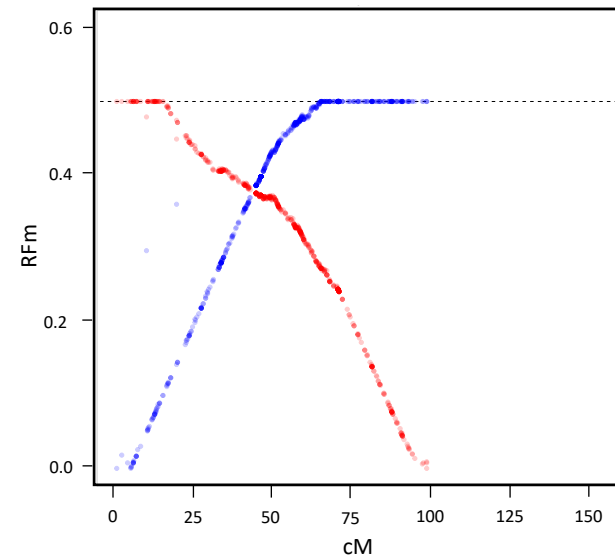**SseLG13**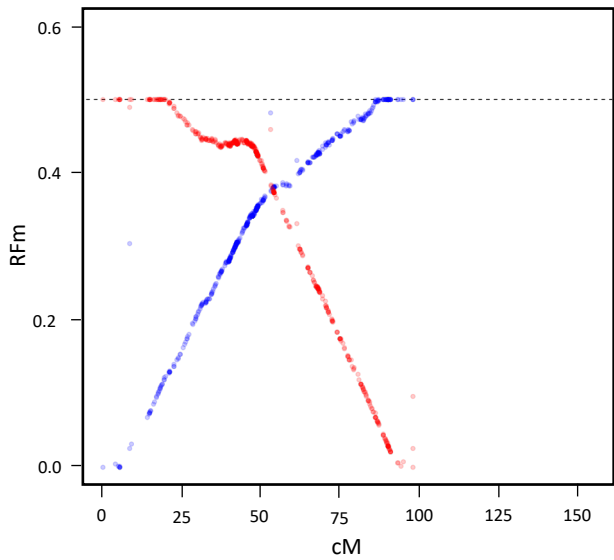**SseLG14**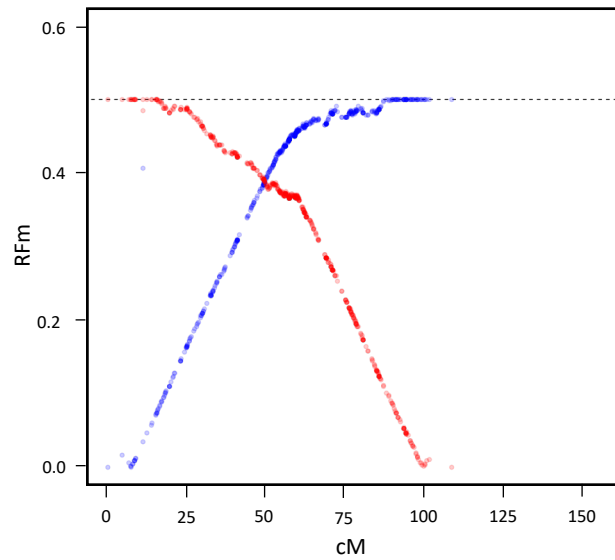**SseLG15**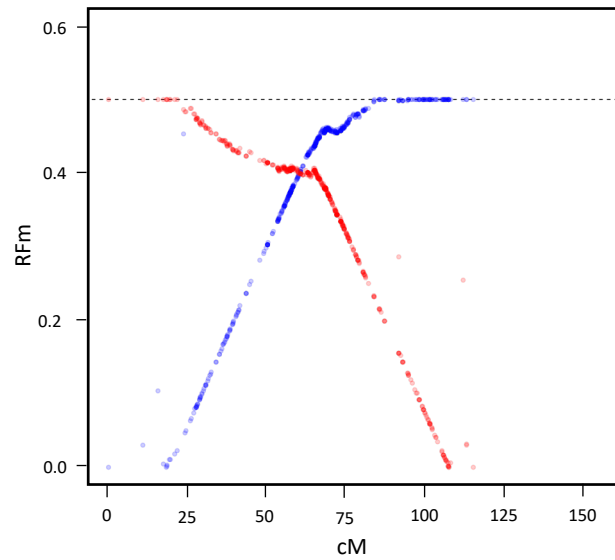**SseLG16**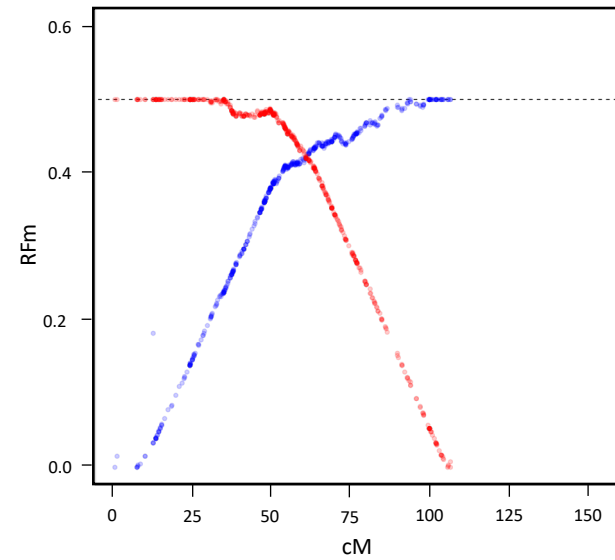

**SseLG17**

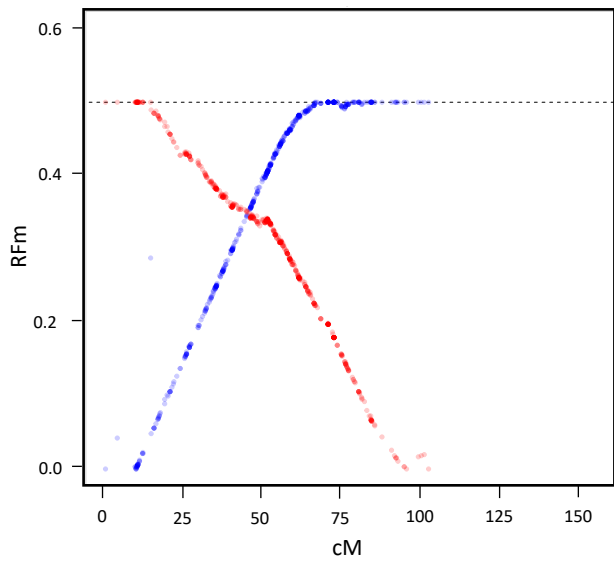

**SseLG18**

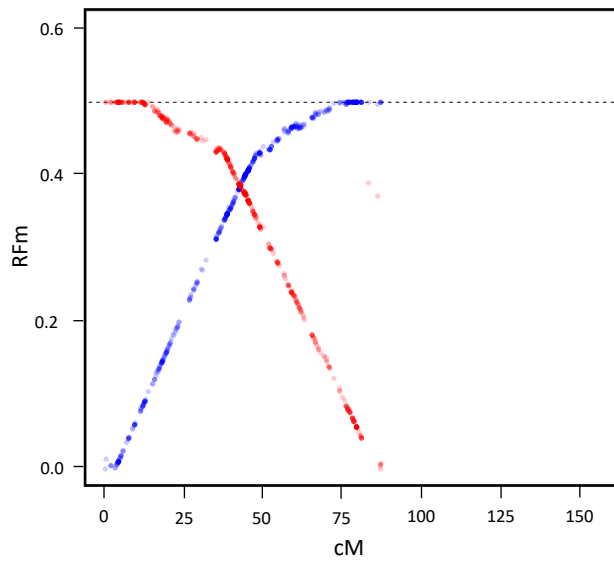

**SseLG19**

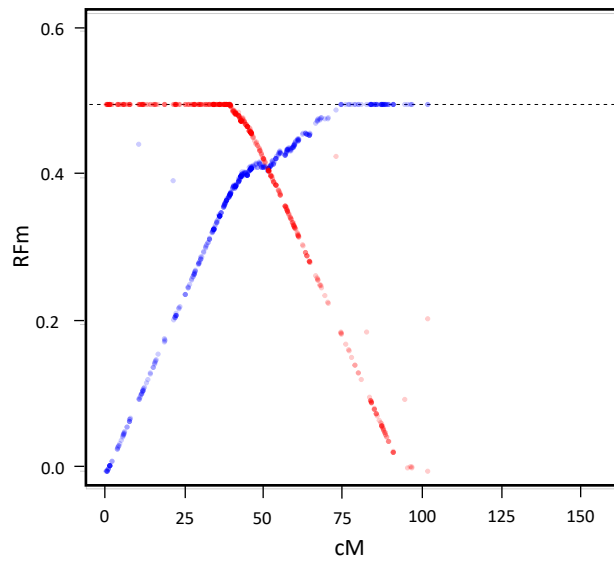

**SseLG20**

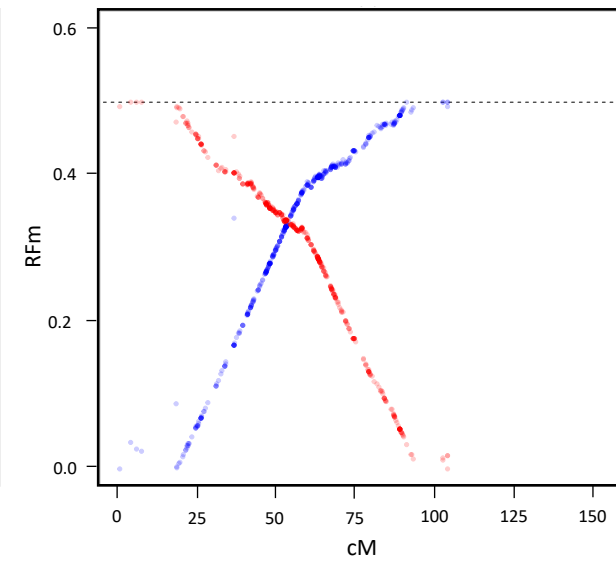

**SseLG21**

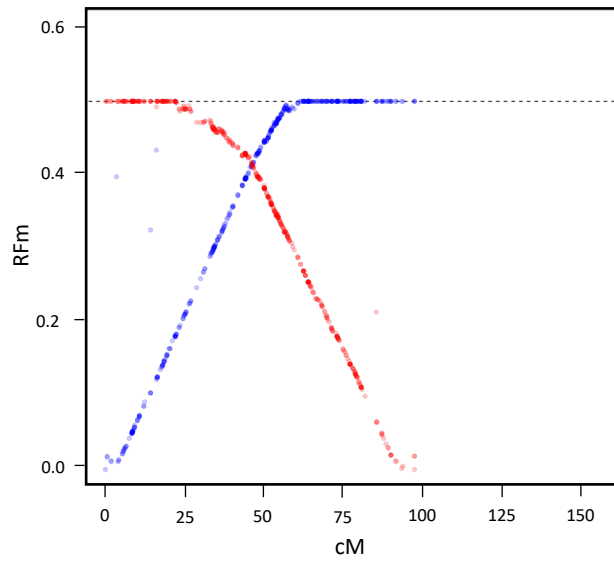

Supplement: 41598_2021_92601_MOESM5_ESM.pdf [file 41598_2021_92601_MOESM5_ESM.pdf]
