# Supplementary material for: Chromosome anchoring in Senegalese sole (Solea senegalensis) reveals sex-associated markers and genome rearrangements in flatfish
Source: PubMed Central journal article supplement (PMC8242048; doi:10.1038/s41598-021-92601-5), 2021-06-29
Supplement: 41598_2021_92601_MOESM7_ESM.pdf [file 41598_2021_92601_MOESM7_ESM.pdf]

*Scophthalmus maximus*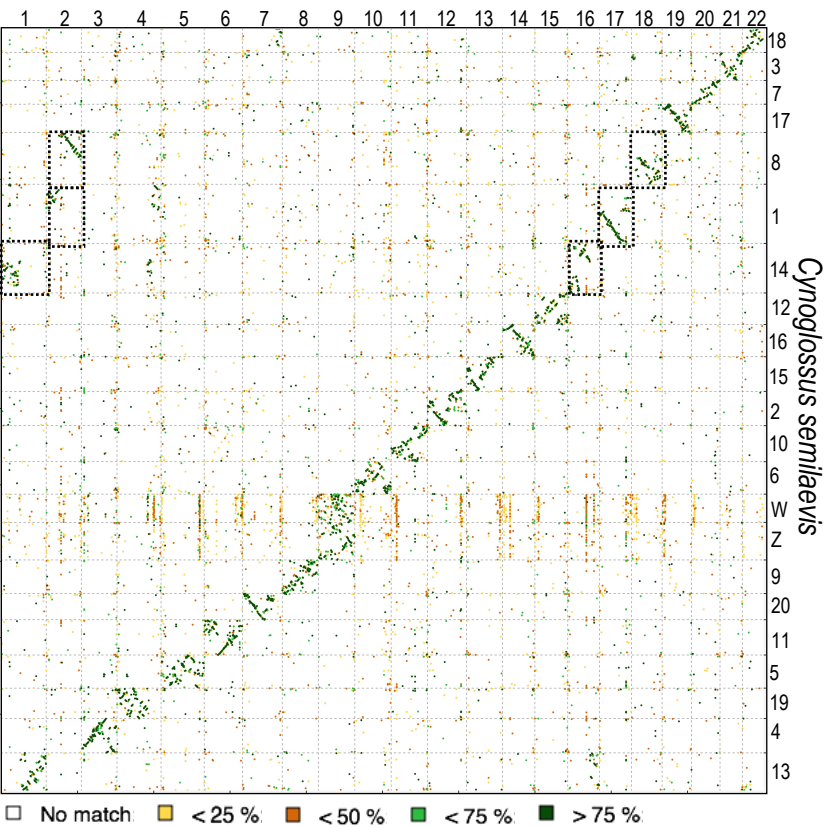*Scophthalmus maximus*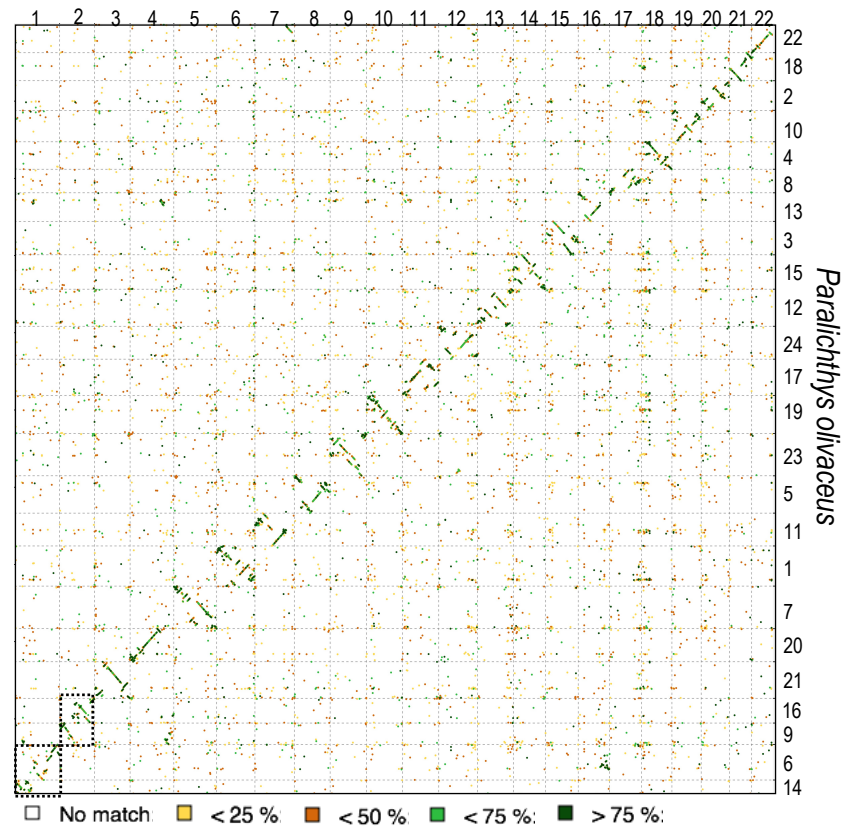*Paralichthys olivaceus*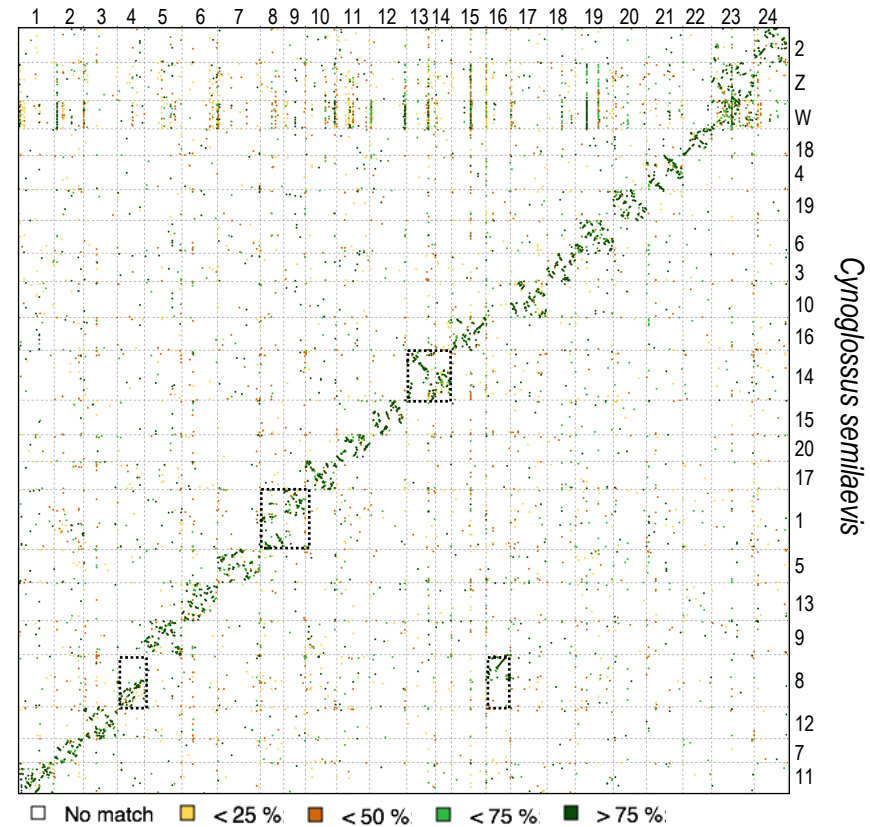

A)

B)
